# Supplementary material for: Knowledge, attitudes, and practices among Indonesian urban communities regarding HPV infection, cervical cancer, and HPV vaccination
Source: PubMed Central journal article supplement (PMC9098048; doi:10.1371/journal.pone.0266139), 2022-05-12
Supplement: pone.0266139.s005.pdf [file pone.0266139.s005.pdf]

## Questionnaire and Scoring Scheme

### Knowledge

| Items                                     | Questions                                                                                          | Answers      | Score               | Dichotomization of Answers |
|-------------------------------------------|----------------------------------------------------------------------------------------------------|--------------|---------------------|----------------------------|
| <b>Aspect 1</b>                           | <b>HPV infection and cervical cancer</b>                                                           |              |                     |                            |
| K1                                        | Do you know that cervical cancer is a disease caused by a viral infection?                         | <b>Yes</b>   | 2                   | Good                       |
|                                           |                                                                                                    | No           | 0                   | Poor                       |
| K2                                        | Do you know about the existence of the Human Papilloma Virus (HPV)?                                | <b>Yes</b>   | 2                   | Good                       |
|                                           |                                                                                                    | No           | 0                   | Poor                       |
| K3                                        | Does HPV infection always cause cancer?                                                            | <b>No</b>    | 2                   | Good                       |
|                                           |                                                                                                    | Yes          | 0                   | Poor                       |
|                                           |                                                                                                    | Don't Know   | 0                   |                            |
| K4                                        | Men can transmit HPV.                                                                              | <b>Yes</b>   | 2                   | Good                       |
|                                           |                                                                                                    | No           | 0                   | Poor                       |
|                                           |                                                                                                    | Don't Know   | 0                   |                            |
| K5                                        | Men are not at risk for HPV infection.                                                             | <b>False</b> | 2                   | Good                       |
|                                           |                                                                                                    | True         | 0                   | Poor                       |
|                                           |                                                                                                    | Don't Know   | 0                   |                            |
| K6                                        | HPV can be transmitted through sexual contact.                                                     | <b>True</b>  | 2                   | Good                       |
|                                           |                                                                                                    | False        | 0                   | Poor                       |
|                                           |                                                                                                    | Don't know   | 0                   |                            |
| K7                                        | HPV infection is very rare (sporadic).                                                             | <b>False</b> | 2                   | Good                       |
|                                           |                                                                                                    | True         | 0                   | Poor                       |
|                                           |                                                                                                    | Don't know   | 0                   |                            |
| K8                                        | HPV infection can cause cervical cancer.                                                           | <b>True</b>  | 2                   | Good                       |
|                                           |                                                                                                    | False        | 0                   | Poor                       |
|                                           |                                                                                                    | Don't know   | 0                   |                            |
| K9                                        | Smoking is a risk factor for HPV infection.                                                        | <b>True</b>  | 2                   | Good                       |
|                                           |                                                                                                    | False        | 0                   | Poor                       |
|                                           |                                                                                                    | Don't know   | 0                   |                            |
| <b>Total Knowledge Score for Aspect 1</b> |                                                                                                    |              | <b>18/18 x 100%</b> |                            |
| <b>Aspect 2</b>                           | <b>HPV Vaccination</b>                                                                             |              |                     |                            |
| K10                                       | Have you ever heard about the HPV vaccine?                                                         | <b>Yes</b>   | 2                   | Good                       |
|                                           |                                                                                                    | No           | 0                   | Poor                       |
| K11                                       | Have you ever heard that vaccination can prevent cervical cancer?                                  | <b>Yes</b>   | 2                   | Good                       |
|                                           |                                                                                                    | No           | 0                   | Poor                       |
| K12                                       | Do you know that the cervical cancer vaccine or HPV vaccine is already available in Indonesia?     | <b>Yes</b>   | 2                   | Good                       |
|                                           |                                                                                                    | No           | 0                   | Poor                       |
| K13                                       | Do you know whom you should reach or contact if you want to get cervical cancer (HPV) vaccination? | <b>Yes</b>   | 2                   | Good                       |
|                                           |                                                                                                    | No           | 0                   | Poor                       |
| K14                                       | Do you think cervical cancer (HPV) vaccine has side effects?                                       | <b>Yes</b>   | 2                   | Good                       |
|                                           |                                                                                                    | No           | 0                   | Poor                       |
|                                           |                                                                                                    | Don't know   | 0                   |                            |
| K15                                       | Do you think the HPV virus can still infect someone if they have been vaccinated?                  | <b>Yes</b>   | 2                   | Good                       |
|                                           |                                                                                                    | No           | 0                   | Poor                       |
|                                           |                                                                                                    | Don't know   | 0                   |                            |
| K16                                       | Do you think that someone who has been infected with HPV still needs to be vaccinated?             | <b>Yes</b>   | 2                   | Good                       |
|                                           |                                                                                                    | No           | 0                   | Poor                       |
|                                           |                                                                                                    | Don't know   | 0                   |                            |
| K17                                       |                                                                                                    | <b>True</b>  | 2                   | Good                       |

|     |                                                                                                                                |              |                     |      |
|-----|--------------------------------------------------------------------------------------------------------------------------------|--------------|---------------------|------|
|     | Women who have been vaccinated still need to have periodic early detection (screening) examinations (Pap's Smear / IVA) later. | False        | 0                   | Poor |
|     |                                                                                                                                | Don't know   | 0                   |      |
| K18 | Vaccination can provide 100% protection against cervical cancer.                                                               | <b>False</b> | 2                   | Good |
|     |                                                                                                                                | True         | 0                   | Poor |
|     |                                                                                                                                | Don't know   | 0                   |      |
| K19 | HPV vaccination is only needed by adults (>30 years).                                                                          | <b>False</b> | 2                   | Good |
|     |                                                                                                                                | True         | 0                   | Poor |
|     |                                                                                                                                | Don't know   | 0                   |      |
| K20 | Only with one dose of vaccination, I will get complete protection against cervical cancer.                                     | <b>False</b> | 2                   | Good |
|     |                                                                                                                                | True         | 0                   | Poor |
|     |                                                                                                                                | Don't know   | 0                   |      |
| K21 | After receiving the total dose of the HPV vaccine, sexual intercourse with multiple partners is allowed.                       | <b>False</b> | 2                   | Good |
|     |                                                                                                                                | True         | 0                   | Poor |
|     |                                                                                                                                | Don't know   | 0                   |      |
|     | <b>Total Knowledge Score for Aspect 2</b>                                                                                      |              | <b>24/24 x 100%</b> |      |
|     | <b>Total Knowledge Score Aspect 1 + 2</b>                                                                                      |              | <b>42/42 x 100%</b> |      |
|     | <b>Score ≥60% = Good; &lt;60% = Poor</b>                                                                                       |              |                     |      |

Notes: The words in bold in the answer column indicate the appropriate answer.

## Attitudes

| Items           | Questions                                                                                    | Answers                 | Score               | Dichotomization of Answers |
|-----------------|----------------------------------------------------------------------------------------------|-------------------------|---------------------|----------------------------|
| <b>Aspect 1</b> | <b>HPV infection and cervical cancer</b>                                                     |                         |                     |                            |
| A1              | Do you think that HPV is a dangerous virus?                                                  | <b>Yes</b>              | 2                   | Positive                   |
|                 |                                                                                              | No                      | 0                   | Negative                   |
|                 |                                                                                              | Don't know              | 0                   |                            |
| A2              | In your opinion, are you susceptible to HPV infection?                                       | <b>Yes</b>              | 2                   | Positive                   |
|                 |                                                                                              | Maybe                   | 1                   |                            |
|                 |                                                                                              | Unsure                  | 0                   | Negative                   |
|                 |                                                                                              | No                      | 0                   |                            |
| A3              | I believe that health is one of the most important aspects of my life.                       | <b>Absolutely agree</b> | 2                   | Positive                   |
|                 |                                                                                              | Agree                   | 1                   |                            |
|                 |                                                                                              | Disagree                | 0                   | Negative                   |
|                 |                                                                                              | Absolutely disagree     | 0                   |                            |
| A4              | Prevention is the primary key in fighting disease.                                           | <b>Absolutely agree</b> | 2                   | Positive                   |
|                 |                                                                                              | Agree                   | 1                   |                            |
|                 |                                                                                              | Disagree                | 0                   | Negative                   |
|                 |                                                                                              | Absolutely disagree     | 0                   |                            |
| A5              | I am worried that I/my partner/people close to me may develop cervical cancer in the future. | <b>Absolutely agree</b> | 2                   | Positive                   |
|                 |                                                                                              | Agree                   | 1                   |                            |
|                 |                                                                                              | Disagree                | 0                   | Negative                   |
|                 |                                                                                              | Absolutely disagree     | 0                   |                            |
|                 | <b>Total Attitude Score for Aspect 1</b>                                                     |                         | <b>10/10 x 100%</b> |                            |
| <b>Aspect 2</b> | <b>HPV Vaccination</b>                                                                       |                         |                     |                            |
| A6              | Do you support HPV vaccination for children?                                                 | <b>Yes</b>              | 2                   | Positive                   |
|                 |                                                                                              | No                      | 0                   | Negative                   |
| A7              | Do you support HPV vaccination for adults?                                                   | <b>Yes</b>              | 2                   | Positive                   |
|                 |                                                                                              | No                      | 0                   | Negative                   |
| A8              | Do you want to get the HPV vaccination?                                                      | <b>Yes</b>              | 2                   | Positive                   |
|                 |                                                                                              | Maybe                   | 1                   |                            |

|                                                  |                                                                     |                            |                     |          |
|--------------------------------------------------|---------------------------------------------------------------------|----------------------------|---------------------|----------|
|                                                  |                                                                     | Unsure                     | 0                   | Negative |
|                                                  |                                                                     | No                         | 0                   |          |
| A9                                               | Do you think that you should also get HPV vaccinated in the future? | <b>Yes</b>                 | 2                   | Positive |
|                                                  |                                                                     | Maybe                      | 1                   |          |
|                                                  |                                                                     | Unsure                     | 0                   | Negative |
|                                                  |                                                                     | No                         | 0                   |          |
| A10                                              | I am afraid of injections.                                          | <b>Absolutely disagree</b> | 2                   | Positive |
|                                                  |                                                                     | Disagree                   | 1                   |          |
|                                                  |                                                                     | Agree                      | 0                   | Negative |
|                                                  |                                                                     | Absolutely agree           | 0                   |          |
| A11                                              | I am worried about the side effects of the HPV vaccine.             | <b>Absolutely disagree</b> | 2                   | Positive |
|                                                  |                                                                     | Disagree                   | 1                   |          |
|                                                  |                                                                     | Agree                      | 0                   | Negative |
|                                                  |                                                                     | Absolutely agree           | 0                   |          |
| A12                                              | I am not afraid if I get HPV vaccinated.                            | <b>Absolutely agree</b>    | 2                   | Positive |
|                                                  |                                                                     | Agree                      | 1                   |          |
|                                                  |                                                                     | Disagree                   | 0                   | Negative |
|                                                  |                                                                     | Absolutely disagree        | 0                   |          |
| <b>Total Attitude Score for Aspect 2</b>         |                                                                     |                            | <b>14/14 x 100%</b> |          |
| <b>Total Attitude Score Aspect 1 + 2</b>         |                                                                     |                            | <b>24/24 x 100%</b> |          |
| <b>Score ≥60% = Positive; &lt;60% = Negative</b> |                                                                     |                            |                     |          |

Notes: The words in bold in the answer column indicate the appropriate answer.

## Practices

| Items | Questions                                                                                                            | Answers                    | Score | Dichotomization of Answers |
|-------|----------------------------------------------------------------------------------------------------------------------|----------------------------|-------|----------------------------|
| P1    | My parents make my vaccination decisions (including HPV vaccination).                                                | <b>Absolutely disagree</b> | 2     | Favorable                  |
|       |                                                                                                                      | Disagree                   | 1     |                            |
|       |                                                                                                                      | Agree                      | 0     | Unfavorable                |
|       |                                                                                                                      | Absolutely agree           | 0     |                            |
| P2    | My friends influenced my decision to receive the HPV vaccination.                                                    | <b>Absolutely disagree</b> | 2     | Favorable                  |
|       |                                                                                                                      | Disagree                   | 1     |                            |
|       |                                                                                                                      | Agree                      | 0     | Unfavorable                |
|       |                                                                                                                      | Absolutely agree           | 0     |                            |
| P3    | HPV vaccine does not conflict with my religion.                                                                      | <b>Absolutely agree</b>    | 2     | Favorable                  |
|       |                                                                                                                      | Agree                      | 1     |                            |
|       |                                                                                                                      | Disagree                   | 0     | Unfavorable                |
|       |                                                                                                                      | Absolutely disagree        | 0     |                            |
| P4    | I have been vaccinated against HPV at least one dose.                                                                | <b>Yes</b>                 | 2     | Favorable                  |
|       |                                                                                                                      | No                         | 0     | Unfavorable                |
| P5    | I am willing to get the HPV vaccination.                                                                             | <b>Absolutely agree</b>    | 2     | Favorable                  |
|       |                                                                                                                      | Agree                      | 1     |                            |
|       |                                                                                                                      | Disagree                   | 0     | Unfavorable                |
|       |                                                                                                                      | Absolutely disagree        | 0     |                            |
| P6    | I am willing to tell my family and partner about the risks of cervical cancer and information about the HPV vaccine. | <b>Absolutely agree</b>    | 2     | Favorable                  |
|       |                                                                                                                      | Agree                      | 1     |                            |
|       |                                                                                                                      | Disagree                   | 0     | Unfavorable                |
|       |                                                                                                                      | Absolutely disagree        | 0     |                            |
| P7    | I want to get more information about HPV.                                                                            | <b>Absolutely agree</b>    | 2     | Favorable                  |
|       |                                                                                                                      | Agree                      | 1     |                            |
|       |                                                                                                                      | Disagree                   | 0     | Unfavorable                |
|       |                                                                                                                      | Absolutely disagree        | 0     |                            |

|  |                                                       |                 |  |
|--|-------------------------------------------------------|-----------------|--|
|  | Total Practice Score                                  | 14/14 x<br>100% |  |
|  | Score $\geq 60\%$ = Favorable; $< 60\%$ = Unfavorable |                 |  |

Notes: The words in bold in the answer column indicate the appropriate answer.
